# Supplementary material
Source: PubMed Central journal article supplement (PMC7527209)
Supplement: NIHMS1627987-supplement-Supplementary_Material.pdf [file NIHMS1627987-supplement-Supplementary_Material.pdf]

## **Psychosocial Risk and its Association with Outcomes in Continuous-Flow Left Ventricular Assist Device Patients**

Ersilia M. DeFilippis MD<sup>1</sup>, Khadijah Breathett MD MS<sup>2</sup>, Elena M. Donald MD<sup>1</sup>, Shunichi Nakagawa MD<sup>3</sup>, Koji Takeda MD PhD<sup>4</sup>, Hiroo Takayama MD PhD<sup>4</sup>, Lauren K. Truby MD<sup>5</sup>, Gabriel Sayer MD<sup>1</sup>, Paolo C. Colombo MD<sup>1</sup>, Melana Yuzefpolskaya MD<sup>1</sup>, Nir Uriel MD MSc<sup>1</sup>, Maryjane A. Farr MD<sup>1</sup>, Veli K. Topkara MD MSc<sup>1</sup>

### **SUPPLEMENTAL MATERIAL**

**Supplemental Table 1.** Laboratory Values and Hemodynamics at Implant by Psychosocial Risk Status

| <u>Variable</u>                         | <u>Overall</u><br>(n=15403, 100%) | <u>Psychosocial Risk</u><br>(n=3163, 20.5%) | <u>No Psychosocial Risk</u><br>(n=12240, 79.5%) | <u>p-value</u>   |
|-----------------------------------------|-----------------------------------|---------------------------------------------|-------------------------------------------------|------------------|
| <b><i>Psychosocial Risk Domains</i></b> |                                   |                                             |                                                 |                  |
| WBC (x10/uL)                            | 8.8 ± 4.2                         | 8.9 ± 4.3                                   | 8.7 ± 4.1                                       | 0.177            |
| Hemoglobin (g/dL)                       | 11.2 ± 2.2                        | 11.2 ± 2.2                                  | 11.2 ± 2.2                                      | 0.764            |
| Platelet (x10/uL)                       | 195.3 ± 80.4                      | 202.0 ± 82.1                                | 193.5 ± 79.9                                    | <b>&lt;0.001</b> |
| Sodium (mEq/dL)                         | 135.1 ± 4.8                       | 134.7 ± 5.0                                 | 135.2 ± 4.8                                     | <b>&lt;0.001</b> |
| BUN (mg/dL)                             | 29.1 ± 18.0                       | 27.9 ± 18.3                                 | 29.4 ± 17.9                                     | <b>&lt;0.001</b> |
| Creatinine (mg/dL)                      | 1.39 ± 0.68                       | 1.35 ± 0.65                                 | 1.40 ± 0.69                                     | <b>0.001</b>     |
| Albumin (g/dL)                          | 3.40 ± 0.65                       | 3.40 ± 0.65                                 | 3.39 ± 0.64                                     | 0.433            |
| Total Bilirubin (mg/dL)                 | 1.41 ± 1.98                       | 1.44 ± 2.05                                 | 1.40 ± 1.97                                     | 0.318            |
| AST (u/L)                               | 57.5 ± 221                        | 54.5 ± 143                                  | 58.3 ± 238                                      | 0.405            |
| ALT (u/L)                               | 67.2 ± 223                        | 66.8 ± 176                                  | 67.3 ± 234                                      | 0.910            |
| INR                                     | 1.31 ± 0.39                       | 1.29 ± 0.37                                 | 1.31 ± 0.39                                     | <b>0.010</b>     |
| BNP (pg/mL)                             | 1153 ± 1090                       | 1193 ± 1166                                 | 1141 ± 1067                                     | 0.108            |
| <b><i>Hemodynamics</i></b>              |                                   |                                             |                                                 |                  |
| HR (bpm)                                | 89 ± 18                           | 91 ± 18                                     | 89 ± 18                                         | <b>&lt;0.001</b> |
| SBP (mmHg)                              | 106 ± 16                          | 105 ± 16                                    | 106 ± 16                                        | <b>0.011</b>     |
| DBP (mmHg)                              | 65 ± 12                           | 66 ± 12                                     | 65 ± 12                                         | <b>0.008</b>     |
| CVP (mmHg)                              | 13.4 ± 8.5                        | 14.0 ± 8.7                                  | 13.2 ± 8.5                                      | <b>&lt;0.001</b> |
| PA Systolic (mmHg)                      | 49.8 ± 14.8                       | 49.9 ± 14.6                                 | 49.7 ± 14.8                                     | 0.588            |
| PA Diastolic (mmHg)                     | 24.9 ± 8.8                        | 25.7 ± 9.1                                  | 24.7 ± 8.7                                      | <b>&lt;0.001</b> |
| PCWP (mmHg)                             | 25.0 ± 9.2                        | 25.4 ± 9.2                                  | 24.9 ± 9.2                                      | 0.056            |
| PAPi                                    | 3.00 ± 3.26                       | 2.79 ± 3.09                                 | 3.06 ± 3.30                                     | <b>0.001</b>     |
| CVP / PCWP                              | 0.55 ± 0.43                       | 0.58 ± 0.52                                 | 0.55 ± 0.41                                     | <b>0.025</b>     |

ALT = alanine aminotransferase; AST = aspartate aminotransferase; BNP = brain natriuretic peptide; BUN = blood urea nitrogen; CVP = central venous pressure; DBP = diastolic blood pressure; HR = heart rate; INR = international normalized ratio; PA = pulmonary artery; PAPi = pulmonary artery pulsatility index; PCWP = pulmonary capillary wedge pressure; SBP = systolic blood pressure WBC = white blood cell count

Supplemental Table 2.

| LVAD Outcomes                                     | Unadjusted Cox Regression |                  | Adjusted Cox Regression* |                  |
|---------------------------------------------------|---------------------------|------------------|--------------------------|------------------|
|                                                   | HR (95% CI)               | p-value          | HR (95% CI)              | p-value          |
| <b>Survival on pump support</b>                   |                           |                  |                          |                  |
| 0 Psychosocial Risk Factor                        | 1.15 (1.05 – 1.26)        | <b>0.004</b>     | 0.99 (0.90 – 1.09)       | 0.842            |
| 1 Psychosocial Risk Factor                        | ...                       | ...              | ...                      | ...              |
| 2+ Psychosocial Risk Factors                      | 0.87 (0.72 – 1.05)        | 0.137            | 0.93 (0.77 – 1.13)       | 0.467            |
| <b>Cardiac Transplantation</b>                    |                           |                  |                          |                  |
| 0 Psychosocial Risk Factor                        | 1.16 (1.05 – 1.27)        | <b>0.002</b>     | 1.16 (1.05 – 1.28)       | <b>0.003</b>     |
| 1 Psychosocial Risk Factor                        | ...                       | ...              | ...                      | ...              |
| 2+ Psychosocial Risk Factors                      | 0.80 (0.67 – 0.97)        | <b>0.021</b>     | 0.83 (0.68 – 1.01)       | 0.060            |
| <b>Device Related Infection</b>                   |                           |                  |                          |                  |
| 0 Psychosocial Risk Factor                        | 0.76 (0.69 – 0.85)        | <b>&lt;0.001</b> | 0.82 (0.73 – 0.91)       | <b>&lt;0.001</b> |
| 1 Psychosocial Risk Factor                        | ...                       | ...              | ...                      | ...              |
| 2+ Psychosocial Risk Factors                      | 1.29 (1.08 – 1.53)        | <b>0.004</b>     | 1.22 (1.02 – 1.46)       | <b>0.034</b>     |
| <b>Gastrointestinal Bleeding</b>                  |                           |                  |                          |                  |
| 0 Psychosocial Risk Factor                        | 1.03 (0.94 – 1.12)        | 0.546            | 0.85 (0.77 – 0.93)       | <b>&lt;0.001</b> |
| 1 Psychosocial Risk Factor                        | ...                       | ...              | ...                      | ...              |
| 2+ Psychosocial Risk Factors                      | 1.01 (0.86 – 1.19)        | 0.918            | 1.10 (0.93 – 1.30)       | 0.270            |
| <b>Device Thrombosis (Suspected or Confirmed)</b> |                           |                  |                          |                  |
| 0 Psychosocial Risk Factor                        | 0.83 (0.74 – 0.94)        | <b>0.002</b>     | 0.87 (0.77 – 0.99)       | <b>0.031</b>     |
| 1 Psychosocial Risk Factor                        | ...                       | ...              | ...                      | ...              |
| 2+ Psychosocial Risk Factors                      | 1.22 (1.00 – 1.49)        | 0.054            | 1.15 (0.93 – 1.41)       | 0.210            |
| <b>Stroke (Ischemic or Hemorrhagic)</b>           |                           |                  |                          |                  |
| 0 Psychosocial Risk Factor                        | 0.98 (0.87 – 1.09)        | 0.656            | 0.89 (0.79 – 1.00)       | 0.059            |
| 1 Psychosocial Risk Factor                        | ...                       | ...              | ...                      | ...              |
| 2+ Psychosocial Risk Factors                      | 0.96 (0.78 – 1.18)        | 0.695            | 0.94 (0.76 – 1.18)       | 0.600            |
| <b>Hospital Readmission</b>                       |                           |                  |                          |                  |
| 0 Psychosocial Risk Factor                        | 0.94 (0.90 – 0.99)        | <b>0.022</b>     | 0.90 (0.85 – 0.95)       | <b>&lt;0.001</b> |
| 1 Psychosocial Risk Factor                        | ...                       | ...              | ...                      | ...              |
| 2+ Psychosocial Risk Factors                      | 1.06 (0.96 – 1.16)        | 0.234            | 1.08 (0.98 – 1.19)       | 0.104            |
